# Supplementary material
Source: HighWire-hosted journal article supplement (https://qualitysafety.bmj.com/content/bmjqs-2024-017264)
Supplement: inline-supplementary-material-1 [file inline-supplementary-material-1.pdf]

## Appendix 1

**Table 1: Name and ICD 10 codes of the 29 cancer sites**

| Cancer Site   | ICD-10 code  | Cancer Site        | ICD-10 code    |
|---------------|--------------|--------------------|----------------|
| Bladder       | C67          | Myeloma            | C90            |
| Brain         | C71          | Oesophageal        | C15            |
| Female Breast | C50          | Oral/oropharyngeal | C1-C6, C9, C10 |
| Cervical      | C53          | Ovarian            | C56, C57       |
| Colon         | C18          | Pancreatic         | C25            |
| Endometrial   | C54, C55     | Prostate           | C61            |
| Gallbladder   | C23          | Rectal             | C19-C20        |
| Laryngeal     | C32          | Renal              | C64            |
| Leukaemia     | C91-C95      | Small intestine    | C17            |
| Liver         | C22          | Stomach            | C16            |
| Lung          | C33, C34     | Testicular         | C62            |
| Lymphoma      | C81-C83, C85 | Thyroid            | C73            |
| Melanoma      | C43          | Unknown primary    | C77-C80        |
| Mesothelioma  | C45          | --                 | --             |

**Table 2: Adjusted odds ratios and 95% confidence intervals of the use of primary care led investigation among patients subsequently diagnosed with cancer (Model 2)**

|                    | Any Investigation |         |                | Blood Test        |         |                | Imaging           |         |                |
|--------------------|-------------------|---------|----------------|-------------------|---------|----------------|-------------------|---------|----------------|
|                    | OR (CI)           | P-value | Global P-Value | OR (CI)           | P-value | Global P-Value | OR (CI)           | P-value | Global P-Value |
| <b>Gender</b>      |                   |         |                |                   |         |                |                   |         |                |
| Male               | Ref               |         |                |                   |         |                |                   |         |                |
| Female             | 1.04 (0.99, 1.09) | 0.152   |                | 0.98 (0.94, 1.03) | 0.539   |                | 1.08 (1.02, 1.14) | 0.007   |                |
| <b>Ethnicity</b>   |                   |         |                |                   |         |                |                   |         |                |
| White              | Ref               |         |                |                   |         |                |                   |         |                |
| Other              | 0.94 (0.88, 1.01) | 0.101   |                | 0.91 (0.85, 0.98) | 0.012   |                | 0.97 (0.90, 1.05) | 0.470   |                |
| <b>Age group</b>   |                   |         |                |                   |         |                |                   |         |                |
| 15-49              | 0.98 (0.90, 1.07) | 0.654   | 0.001          | 0.91 (0.83, 0.99) | 0.034   | 0.089          | 1.31 (1.19, 1.44) | <0.001  | <0.001         |
| 50-59              | 0.98 (0.92, 1.05) | 0.63    |                | 0.95 (0.88, 1.02) | 0.129   |                | 1.03 (0.95, 1.12) | 0.424   |                |
| 60-69              | Ref               |         |                |                   |         |                |                   |         |                |
| 70-79              | 0.97 (0.92, 1.03) | 0.274   |                | 1.01 (0.96, 1.07) | 0.611   |                | 0.96 (0.90, 1.02) | 0.195   |                |
| 80+                | 0.88 (0.83, 0.93) | <0.001  |                | 1.00 (0.94, 1.06) | 0.927   |                | 0.78 (0.73, 0.84) | <0.001  |                |
| <b>Deprivation</b> |                   |         |                |                   |         |                |                   |         |                |
| 1-least deprived   | Ref               |         |                |                   |         |                |                   |         |                |
| 2                  | 1.01 (0.95, 1.08) | 0.666   | 0.253          | 1.04 (0.98, 1.11) | 0.218   | <0.001         | 0.98 (0.91, 1.06) | 0.653   | 0.550          |
| 3                  | 0.96 (0.90, 1.03) | 0.259   |                | 0.93 (0.87, 0.99) | 0.027   |                | 0.97 (0.90, 1.04) | 0.371   |                |
| 4                  | 0.98 (0.91, 1.04) | 0.453   |                | 0.93 (0.87, 1.00) | 0.041   |                | 1.03 (0.95, 1.11) | 0.464   |                |
| 5-most deprived    | 0.95 (0.89, 1.01) | 0.117   |                | 0.90 (0.85, 0.97) | 0.002   |                | 0.99 (0.92, 1.06) | 0.837   |                |
| <b>Morbidities</b> |                   |         |                |                   |         |                |                   |         |                |
| 0                  | Ref               |         |                |                   |         |                |                   |         |                |
| 1                  | 0.86 (0.81, 0.92) | <0.001  | <0.001         | 0.87 (0.82, 0.92) | <0.001  | <0.001         | 0.93 (0.86, 0.99) | 0.025   | <0.001         |
| 2                  | 0.79 (0.74, 0.85) | <0.001  |                | 0.83 (0.77, 0.88) | <0.001  |                | 0.87 (0.81, 0.94) | <0.001  |                |
| 3                  | 0.74 (0.69, 0.80) | <0.001  |                | 0.78 (0.72, 0.84) | <0.001  |                | 0.81 (0.74, 0.88) | <0.001  |                |

|                    |                   |        |        |                   |        |        |                     |        |        |
|--------------------|-------------------|--------|--------|-------------------|--------|--------|---------------------|--------|--------|
| 4 <sup>+</sup>     | 0.66 (0.61, 0.72) | <0.001 |        | 0.73 (0.68, 0.80) | <0.001 |        | 0.73 (0.66, 0.80)   | <0.001 |        |
| <b>Cancer site</b> |                   |        |        |                   |        |        |                     |        |        |
| Bladder            | 1.04 (0.92, 1.19) | 0.508  | <0.001 | 0.46 (0.40, 0.52) | <0.001 | <0.001 | 0.84 (0.70, 0.99)   | 0.039  | <0.001 |
| Brain              | 0.21 (0.17, 0.25) | <0.001 |        | 0.19 (0.16, 0.23) | <0.001 |        | 0.60 (0.47, 0.77)   | <0.001 |        |
| Breast             | 0.03 (0.03, 0.04) | <0.001 |        | 0.03 (0.02, 0.03) | <0.001 |        | 0.13 (0.11, 0.16)   | <0.001 |        |
| Cervical           | 0.45 (0.35, 0.57) | <0.001 |        | 0.19 (0.14, 0.26) | <0.001 |        | 0.96 (0.69, 1.34)   | 0.831  |        |
| Colon              | Ref               |        |        |                   |        |        |                     |        |        |
| Endometrial        | 0.46 (0.40, 0.52) | <0.001 |        | 0.23 (0.20, 0.26) | <0.001 |        | 1.86 (1.61, 2.15)   | <0.001 |        |
| Gallbladder        | 1.13 (0.80, 1.60) | 0.481  |        | 0.87 (0.63, 1.21) | 0.445  |        | 3.25 (2.32, 4.54)   | <0.001 |        |
| Laryngeal          | 0.37 (0.30, 0.47) | <0.001 |        | 0.17 (0.13, 0.22) | <0.001 |        | 2.16 (1.68, 2.75)   | <0.001 |        |
| Leukaemia          | 1.50 (1.30, 1.73) | <0.001 |        | 1.68 (1.46, 1.93) | <0.001 |        | 0.73 (0.61, 0.88)   | 0.001  |        |
| Liver              | 0.85 (0.73, 0.99) | 0.043  |        | 0.74 (0.63, 0.86) | <0.001 |        | 2.71 (2.29, 3.21)   | <0.001 |        |
| Lung               | 0.97 (0.89, 1.06) | 0.518  |        | 0.32 (0.30, 0.35) | <0.001 |        | 6.07 (5.49, 6.70)   | <0.001 |        |
| Lymphoma           | 0.88 (0.79, 0.98) | 0.022  |        | 0.62 (0.56, 0.69) | <0.001 |        | 2.50 (2.21, 2.83)   | <0.001 |        |
| Melanoma           | 0.05 (0.04, 0.06) | <0.001 |        | 0.02 (0.02, 0.02) | <0.001 |        | 0.08 (0.06, 0.11)   | <0.001 |        |
| Mesothelioma       | 1.42 (1.14, 1.77) | 0.002  |        | 0.39 (0.32, 0.48) | <0.001 |        | 10.12 (8.13, 12.60) | <0.001 |        |
| Myeloma            | 1.50 (1.27, 1.77) | <0.001 |        | 1.42 (1.21, 1.67) | <0.001 |        | 2.01 (1.69, 2.38)   | <0.001 |        |
| Oesophageal        | 0.58 (0.51, 0.66) | <0.001 |        | 0.49 (0.43, 0.55) | <0.001 |        | 0.67 (0.55, 0.80)   | <0.001 |        |
| Oral               | 0.19 (0.16, 0.22) | <0.001 |        | 0.15 (0.12, 0.17) | <0.001 |        | 0.83 (0.70, 0.99)   | 0.046  |        |
| Ovarian            | 1.18 (1.01, 1.37) | 0.032  |        | 0.86 (0.74, 0.98) | 0.021  |        | 3.89 (3.35, 4.52)   | <0.001 |        |
| Pancreatic         | 1.22 (1.07, 1.38) | 0.003  |        | 1.03 (0.91, 1.16) | 0.602  |        | 2.50 (2.19, 2.87)   | <0.001 |        |
| Prostate           | 3.28 (2.98, 3.61) | <0.001 |        | 3.34 (3.05, 3.66) | <0.001 |        | 0.45 (0.40, 0.51)   | <0.001 |        |
| Rectal             | 0.76 (0.68, 0.85) | <0.001 |        | 0.80 (0.72, 0.90) | <0.001 |        | 0.34 (0.28, 0.42)   | <0.001 |        |
| Renal              | 0.75 (0.66, 0.85) | <0.001 |        | 0.39 (0.34, 0.44) | <0.001 |        | 2.55 (2.22, 2.92)   | <0.001 |        |
| Small intestine    | 0.95 (0.72, 1.25) | 0.7    |        | 0.82 (0.63, 1.07) | 0.188  |        | 1.38 (1.01, 1.88)   | 0.045  |        |
| Stomach            | 1.14 (0.98, 1.33) | 0.094  |        | 0.94 (0.81, 1.09) | 0.246  |        | 1.03 (0.85, 1.25)   | 0.748  |        |
| Testicular         | 0.78 (0.62, 0.98) | 0.031  |        | 0.08 (0.06, 0.11) | <0.001 |        | 4.63 (3.68, 5.83)   | <0.001 |        |
| Thyroid            | 1.05 (0.87, 1.27) | 0.593  |        | 0.48 (0.40, 0.57) | <0.001 |        | 4.12 (3.41, 4.97)   | <0.001 |        |
| Vulval             | 0.10 (0.07, 0.16) | <0.001 |        | 0.06 (0.04, 0.11) | <0.001 |        | 0.26 (0.14, 0.49)   | <0.001 |        |

|                 |                   |        |  |                   |        |  |                   |        |  |
|-----------------|-------------------|--------|--|-------------------|--------|--|-------------------|--------|--|
| Unknown primary | 0.78 (0.68, 0.90) | 0.001  |  | 0.60 (0.52, 0.69) | <0.001 |  | 2.48 (2.12, 2.90) | <0.001 |  |
| Other           | 0.47 (0.42, 0.52) | <0.001 |  | 0.33 (0.30, 0.37) | <0.001 |  | 1.45 (1.28, 1.65) | <0.001 |  |

**Table 3: Odds ratios and 95% confidence intervals in the mixed model (adjusted for patients and practice factors) of the use of investigation among patients subsequently diagnosed with cancer (Model 4)**

|                    | Any Investigation |         |                | Blood Tests       |         |                | Imaging           |         |                |
|--------------------|-------------------|---------|----------------|-------------------|---------|----------------|-------------------|---------|----------------|
|                    | OR (CI)           | P-value | Global P-Value | OR (CI)           | P-value | Global P-Value | OR (CI)           | P-value | Global P-Value |
| <b>Gender</b>      |                   |         |                |                   |         |                |                   |         |                |
| Male               | Ref               |         |                |                   |         |                |                   |         |                |
| Female             | 1.03 (0.98, 1.08) | 0.285   |                | 0.98 (0.93, 1.03) | 0.483   |                | 1.07 (1.01, 1.13) | 0.021   |                |
| <b>Ethnicity</b>   |                   |         |                |                   |         |                |                   |         |                |
| White              | Ref               |         |                |                   |         |                |                   |         |                |
| Non-white          | 0.97 (0.89, 1.05) | 0.445   |                | 0.95 (0.88, 1.03) | 0.251   |                | 0.98 (0.89, 1.06) | 0.606   |                |
| <b>Age group</b>   |                   |         |                |                   |         |                |                   |         |                |
| 15-49              | 0.95 (0.87, 1.04) | 0.293   | 0.002          | 0.88 (0.80, 0.97) | 0.012   | 0.026          | 1.28 (1.16, 1.42) | <0.001  | 0.649          |
| 50-59              | 0.97 (0.90, 1.04) | 0.397   |                | 0.95 (0.88, 1.02) | 0.156   |                | 1.02 (0.94, 1.11) | 0.619   |                |
| 60-69              | Ref               |         |                |                   |         |                |                   |         |                |
| 70-79              | 0.97 (0.92, 1.03) | 0.387   |                | 1.03 (0.97, 1.09) | 0.384   |                | 0.97 (0.90, 1.03) | 0.313   |                |
| 80+                | 0.88 (0.82, 0.94) | <0.001  |                | 0.99 (0.93, 1.06) | 0.856   |                | 0.79 (0.73, 0.85) | <0.001  |                |
| <b>Deprivation</b> |                   |         |                |                   |         |                |                   |         |                |
| 1-least deprived   | Ref               |         |                |                   |         |                |                   |         |                |
| 2                  | 1.00 (0.93, 1.07) | 0.942   | 0.267          | 1.02 (0.94, 1.10) | 0.642   | 0.002          | 0.98 (0.90, 1.07) | 0.656   | 0.350          |
| 3                  | 0.96 (0.89, 1.03) | 0.277   |                | 0.92 (0.85, 0.99) | 0.023   |                | 0.97 (0.89, 1.05) | 0.420   |                |
| 4                  | 0.97 (0.90, 1.05) | 0.454   |                | 0.91 (0.84, 0.98) | 0.019   |                | 1.04 (0.96, 1.33) | 0.317   |                |

|                    |                   |        |                   |                   |                   |        |                     |        |        |
|--------------------|-------------------|--------|-------------------|-------------------|-------------------|--------|---------------------|--------|--------|
| 5-most deprived    | 0.94 (0.86, 1.00) | 0.051  |                   | 0.89 (0.82, 0.96) | 0.004             |        | 0.98 (0.90, 1.07)   | 0.637  |        |
| <b>Morbidities</b> |                   |        |                   |                   |                   |        |                     |        |        |
| 0                  | Ref               |        |                   |                   |                   |        |                     |        |        |
| 1                  | 0.84 (0.79, 0.90) | <0.001 | <0.001            | 0.86 (0.80, 0.91) | <0.001            | <0.001 | 0.90 (0.84, 0.97)   | 0.005  | <0.001 |
| 2                  | 0.77 (0.72, 0.83) | <0.001 |                   | 0.81 (0.75, 0.87) | <0.001            |        | 0.86 (0.80, 0.93)   | <0.001 |        |
| 3                  | 0.72 (0.67, 0.78) | <0.001 |                   | 0.77 (0.71, 0.84) | <0.001            |        | 0.80 (0.73, 0.88)   | <0.001 |        |
| 4+                 | 0.63 (0.58, 0.69) | <0.001 |                   | 0.70 (0.64, 0.77) | <0.001            |        | 0.71 (0.64, 0.79)   | <0.001 |        |
| <b>Cancer site</b> |                   |        |                   |                   |                   |        |                     |        |        |
| Bladder            | 1.02 (0.89, 1.17) | 0.554  | <0.001            | 0.43 (0.37, 0.49) | <0.001            | <0.001 | 0.83 (0.70, 0.99)   | 0.049  | <0.001 |
| Brain              | 0.20 (0.16, 0.24) | <0.001 |                   | 0.18 (0.15, 0.23) | <0.001            |        | 0.59 (0.45, 0.77)   | <0.001 |        |
| Breast             | 0.03 (0.02, 0.03) | <0.001 |                   | 0.02 (0.02, 0.03) | <0.001            |        | 0.13 (0.11, 0.16)   | <0.001 |        |
| Cervical           | 0.46 (0.35, 0.60) | <0.001 |                   | 0.19 (0.14, 0.25) | <0.001            |        | 1.03 (0.73, 1.46)   | 0.858  |        |
| Colon              | Ref               |        |                   |                   |                   |        |                     |        |        |
| Endometrial        | 0.43 (0.38, 0.50) | 0.489  |                   | 0.21 (0.18, 0.25) | <0.001            |        | 1.83 (1.57, 2.13)   | <0.001 |        |
| Gallbladder        | 1.13 (0.78, 1.64) | <0.001 |                   | 0.90 (0.63, 1.27) | 0.539             |        | 3.24 (2.26, 4.62)   | <0.001 |        |
| Laryngeal          | 0.36 (0.28, 0.46) | <0.001 |                   | 0.16 (0.12, 0.21) | <0.001            |        | 2.13 (1.64, 2.76)   | <0.001 |        |
| Leukaemia          | 1.47 (1.26, 1.72) | 0.029  |                   | 1.66 (1.43, 1.93) | <0.001            |        | 0.69 (0.57, 0.84)   | <0.001 |        |
| Liver              | 0.82 (0.69, 0.97) | 0.371  |                   | 0.70 (0.59, 0.83) | <0.001            |        | 2.74 (2.29, 3.29)   | <0.001 |        |
| Lung               | 0.95 (0.87, 1.04) | 0.015  |                   | 0.30 (0.28, 0.33) | <0.001            |        | 6.22 (5.60, 6.92)   | <0.001 |        |
| Lymphoma           | 0.87 (0.77, 0.98) | <0.001 |                   | 0.59 (0.52, 0.66) | <0.001            |        | 2.54 (2.22, 2.89)   | <0.001 |        |
| Melanoma           | 0.04 (0.04, 0.05) | 0.003  |                   | 0.02 (0.01, 0.02) | <0.001            |        | 0.08 (0.06, 0.11)   | <0.001 |        |
| Mesothelioma       | 1.42 (1.12, 1.81) | <0.001 |                   | 0.39 (0.31, 0.48) | <0.001            |        | 10.27 (8.13, 12.98) | <0.001 |        |
| Myeloma            | 1.47 (1.22, 1.76) | <0.001 |                   | 1.39 (1.17, 1.66) | <0.001            |        | 2.05 (1.71, 2.46)   | <0.001 |        |
| Oesophageal        | 0.56 (0.48, 0.64) | <0.001 |                   | 0.45 (0.39, 0.52) | <0.001            |        | 0.64 (0.53, 0.79)   | <0.001 |        |
| Oral               | 0.18 (0.15, 0.21) | 0.035  |                   | 0.14 (0.12, 0.17) | <0.001            |        | 0.83 (0.69, 1.01)   | 0.069  |        |
| Ovarian            | 1.15 (0.98, 1.35) | 0.003  |                   | 0.81 (0.70, 0.95) | 0.008             |        | 3.81 (3.24, 4.48)   | <0.001 |        |
| Pancreatic         | 1.17 (1.02, 1.35) | <0.001 |                   | 1.00 (0.88, 1.14) | 0.969             |        | 2.50 (2.16, 2.89)   | <0.001 |        |
| Prostate           | 3.33 (3.01, 3.69) | <0.001 |                   | 3.41 (3.09, 3.76) | <0.001            |        | 0.44 (0.39, 0.50)   | <0.001 |        |
| Rectal             | 0.73 (0.64, 0.83) | <0.001 | 0.76 (0.68, 0.86) | <0.001            | 0.34 (0.27, 0.42) | <0.001 |                     |        |        |

|                               |                   |        |       |                   |        |       |                   |        |       |
|-------------------------------|-------------------|--------|-------|-------------------|--------|-------|-------------------|--------|-------|
| Renal                         | 0.74 (0.65, 0.84) | 0.821  |       | 0.36 (0.32, 0.42) | <0.001 |       | 2.58 (2.23, 2.98) | <0.001 |       |
| Small intestine               | 0.96 (0.72, 1.29) | 0.172  |       | 0.83 (0.63, 1.10) | 0.203  |       | 1.22 (0.88, 1.72) | 0.236  |       |
| Stomach                       | 1.13 (0.95, 1.33) | 0.033  |       | 0.91 (0.78, 1.07) | 0.241  |       | 1.02 (0.84, 1.25) | 0.847  |       |
| Testicular                    | 0.78 (0.61, 1.00) | 0.527  |       | 0.07 (0.05, 0.10) | <0.001 |       | 4.81 (3.76, 6.14) | <0.001 |       |
| Thyroid                       | 1.06 (0.86, 1.30) | <0.001 |       | 0.48 (0.39, 0.58) | <0.001 |       | 4.35 (3.56, 5.32) | <0.001 |       |
| Vulval                        | 0.10 (0.07, 0.16) | <0.001 |       | 0.06 (0.03, 0.10) | <0.001 |       | 0.29 (0.15, 0.56) | <0.001 |       |
| Unknown primary               | 0.79 (0.67, 0.92) | <0.001 |       | 0.60 (0.51, 0.70) | <0.001 |       | 2.59 (2.20, 3.06) | <0.001 |       |
| Other                         | 0.45 (0.40, 0.50) | 0.489  |       | 0.31 (0.27, 0.35) | <0.001 |       | 1.46 (1.27, 1.67) | <0.001 |       |
| <b>Practice level factors</b> |                   |        |       |                   |        |       |                   |        |       |
| <b>Practice Deprivation</b>   |                   |        |       |                   |        |       |                   |        |       |
| 1-least deprived              | Ref               |        |       |                   |        |       |                   |        |       |
| 2                             | 1.03 (0.93, 1.15) | 0.552  | 0.295 | 1.08 (0.96, 1.20) | 0.19   | 0.29  | 0.94 (0.85, 1.04) | 0.257  | 0.819 |
| 3                             | 1.08 (0.97, 1.21) | 0.144  |       | 1.11 (1.00, 1.24) | 0.061  |       | 0.97 (0.88, 1.07) | 0.588  |       |
| 4                             | 1.03 (0.92, 1.15) | 0.609  |       | 1.11 (0.99, 1.24) | 0.069  |       | 0.96 (0.86, 1.06) | 0.434  |       |
| 5-most deprived               | 1.04 (0.93, 1.17) | 0.502  |       | 1.13 (1.00, 1.27) | 0.051  |       | 0.94 (0.85, 1.05) | 0.355  |       |
| <b>Rurality</b>               |                   |        |       |                   |        |       |                   |        |       |
| Urban practice                | Ref               |        |       |                   |        |       |                   |        |       |
| Rural practice                | 0.86 (0.76, 0.96) | 0.010  |       | 0.90 (0.80, 1.02) | 0.105  |       | 0.91 (0.81, 1.02) | 0.088  |       |
| <b>Total patients per GP</b>  |                   |        |       |                   |        |       |                   |        |       |
| Size 1                        | Ref               |        |       |                   |        |       |                   |        |       |
| Size 2                        | 1.06 (0.98, 1.15) | 0.167  | 0.162 | 1.11 (1.02, 1.21) | 0.016  | 0.024 | 1.02 (0.95, 1.11) | 0.537  | 0.819 |
| Size 3                        | 1.08 (0.97, 1.19) | 0.158  |       | 1.14 (1.03, 1.27) | 0.013  |       | 1.01 (0.92, 1.12) | 0.790  |       |
| GPPS Access                   | 1.01 (0.95, 1.08) | 0.641  |       | 1.01 (0.95, 1.07) | 0.791  |       | 0.97 (0.92, 1.03) | 0.397  |       |
| GPPS Continuity               | 1.01 (0.96, 1.07) | 0.654  |       | 1.01 (0.96, 1.07) | 0.709  |       | 1.01 (0.96, 1.05) | 0.785  |       |
| GPPS Satisfaction             | 0.98 (0.89, 1.08) | 0.656  |       | 1.00 (0.90, 1.10) | 0.975  |       | 1.07 (0.98, 1.17) | 0.130  |       |
| GPPS doctors<br>Communication | 1.03 (0.97, 1.11) | 0.337  |       | 1.05 (0.98, 1.13) | 0.175  |       | 0.95 (0.89, 1.01) | 0.123  |       |
| TWW referral                  | 1.02 (0.98, 1.05) | 0.345  |       | 1.00 (0.96, 1.03) | 0.783  |       | 1.04 (1.00, 1.07) | 0.030  |       |
| MaxQoF                        | 0.97 (0.93, 1.01) | 0.094  |       | 0.98 (0.94, 1.01) | 0.193  |       | 0.99 (0.97, 1.03) | 0.907  |       |

|                         |                   |       |  |                   |       |  |                   |       |  |
|-------------------------|-------------------|-------|--|-------------------|-------|--|-------------------|-------|--|
| Patients per GP         | 1.02 (0.98, 1.05) | 0.339 |  | 1.03 (0.99, 1.07) | 0.102 |  | 0.98 (0.95, 1.01) | 0.227 |  |
| Patients over 65 per GP | 1.05 (1.01, 1.10) | 0.016 |  | 1.04 (1.00, 1.09) | 0.058 |  | 1.04 (1.00, 1.08) | 0.046 |  |

**Table 4: Characteristics of primary care patients subsequently diagnosed with cancer based on the use of investigation**

| <b>Exposure variables</b> | <b>Total Patients</b><br>N=53,252<br>(column %) | <b>Any test</b><br>N=29,932<br>(row %) | <b>Blood Tests</b><br>N=23,422<br>(row %) | <b>Imaging</b><br>N= 12,368<br>(row %) | <b>Endoscopy</b><br>N= 845<br>(row %) |
|---------------------------|-------------------------------------------------|----------------------------------------|-------------------------------------------|----------------------------------------|---------------------------------------|
| <b>Gender</b>             |                                                 |                                        |                                           |                                        |                                       |
| Male                      | 29,155 (54.8)                                   | 19,224 (66.0)                          | 15,867 (54.4)                             | 6,441 (22.1)                           | 474 (1.6)                             |
| Female                    | 24,097 (45.3)                                   | 10,708 (44.4)                          | 7,555 (31.4)                              | 5,927 (24.6)                           | 371 (1.5)                             |
| <b>Ethnicity</b>          |                                                 |                                        |                                           |                                        |                                       |
| White                     | 46,297 (90.8)                                   | 26,029 (56.2)                          | 20,322 (44.0)                             | 10,822 (23.4)                          | 729 (1.6)                             |
| Other                     | 4,686 (9.2)                                     | 2,575 (55.0)                           | 1,993 (42.5)                              | 1,074 (23.0)                           | 89 (1.9)                              |
| <b>Age group</b>          |                                                 |                                        |                                           |                                        |                                       |
| 15-49                     | 5,610 (10.6)                                    | 2,313 (41.2)                           | 1,510 (26.9)                              | 1,412 (25.2)                           | 79 (1.4)                              |
| 50-59                     | 7,421 (14.0)                                    | 3,961 (53.4)                           | 3,024 (40.8)                              | 1,675 (22.6)                           | 114 (1.5)                             |
| 60-69                     | 12,385 (23.4)                                   | 7,592 (61.3)                           | 6,056 (49.0)                              | 2,915 (23.5)                           | 209 (1.7)                             |
| 70-79                     | 15,874 (30.0)                                   | 9,606 (60.5)                           | 7,643 (48.2)                              | 3,873 (24.4)                           | 262 (1.6)                             |
| 80+                       | 11,711 (22.1)                                   | 6,390 (54.6)                           | 5,139 (44.0)                              | 2,469 (21.1)                           | 181 (1.5)                             |
| <b>Deprivation</b>        |                                                 |                                        |                                           |                                        |                                       |
| 1 – least deprived        | 10,792 (20.3)                                   | 6,058 (56.1)                           | 4,952 (46.0)                              | 2,212 (20.5)                           | 156 (1.5)                             |
| 2                         | 10,587 (20.0)                                   | 6,030 (57.0)                           | 4,911 (46.4)                              | 2,301 (21.7)                           | 157 (1.5)                             |
| 3                         | 10,562 (19.8)                                   | 5,918 (56.0)                           | 4,628 (43.8)                              | 2,368 (22.4)                           | 164 (1.6)                             |
| 4                         | 10,367 (19.5)                                   | 5,838 (56.3)                           | 4,463 (43.1)                              | 2,589 (25.0)                           | 181 (1.7)                             |
| 5 – most deprived         | 10,944 (20.6)                                   | 6,088 (55.6)                           | 4,468 (40.8)                              | 2,898 (26.5)                           | 187 (1.7)                             |
| <b>Morbidities</b>        |                                                 |                                        |                                           |                                        |                                       |
| 0                         | 12,301 (23.1)                                   | 6,589 (53.6)                           | 5,106 (41.5)                              | 2,793 (22.7)                           | 187 (1.5)                             |
| 1                         | 15,948 (30.0)                                   | 9,247 (58.0)                           | 7,300 (45.8)                              | 3,685 (23.1)                           | 240 (1.5)                             |
| 2                         | 12,539 (23.6)                                   | 7,258 (58.0)                           | 5,704 (45.5)                              | 3,000 (24.0)                           | 190 (1.5)                             |
| 3                         | 7,239 (13.6)                                    | 4,074 (56.3)                           | 3,178 (44.0)                              | 1,696 (23.4)                           | 130 (1.8)                             |
| 4+                        | 5,225 (9.8)                                     | 2,764 (53.0)                           | 2,134 (40.8)                              | 1,194 (22.8)                           | 98 (1.8)                              |
| <b>Cancer site</b>        |                                                 |                                        |                                           |                                        |                                       |
| Bladder                   | 1,487 (2.8)                                     | 977 (65.7)                             | 603 (40.6)                                | 215 (14.5)                             | 10 (0.7)                              |
| Brain                     | 699 (1.3)                                       | 202 (29.0)                             | 154 (22.0)                                | 83 (11.8)                              | 1 (0.1)                               |
| Breast                    | 5,881 (11.0)                                    | 380 (6.5)                              | 244 (4.2)                                 | 190 (3.2)                              | 5 (0.1)                               |
| Cervical                  | 251 (0.5)                                       | 118 (47.0)                             | 64 (25.5)                                 | 52 (20.7)                              | 8 (3.2)                               |
| Colon                     | 3,758 (7.1)                                     | 2,518 (65.1)                           | 2,289 (61.0)                              | 661 (17.6)                             | 153 (4.1)                             |
| Endometrial               | 1,517 (3.0)                                     | 723 (47.7)                             | 386 (25.4)                                | 466 (30.7)                             | 6 (0.4)                               |
| Gallbladder               | 157 (0.3)                                       | 106 (67.5)                             | 87 (55.4)                                 | 63 (40.1)                              | 4 (2.6)                               |
| Laryngeal                 | 345 (0.7)                                       | 143 (41.5)                             | 69 (20.0)                                 | 109 (31.6)                             | 0 (0.0)                               |
| Leukaemia                 | 1,399 (2.6)                                     | 1,004 (71.8)                           | 971 (69.4)                                | 185 (13.2)                             | 6 (0.4)                               |
| Liver                     | 832 (1.6)                                       | 502 (60.3)                             | 425 (51.1)                                | 301 (36.2)                             | 18 (2.2)                              |
| Lung                      | 6,960 (13.1)                                    | 4,461 (64.1)                           | 2,238 (32.2)                              | 3,879 (55.7)                           | 70 (1.0)                              |
| Lymphoma                  | 2,251 (4.2)                                     | 1,415 (62.9)                           | 1,086 (48.3)                              | 809 (36.0)                             | 28 (1.2)                              |
| Melanoma                  | 2,614 (5.0)                                     | 228 (8.7)                              | 75 (3.0)                                  | 49 (1.8)                               | 0 (0.0)                               |
| Mesothelioma              | 450 (1.0)                                       | 328 (72.9)                             | 169 (37.6)                                | 304 (67.6)                             | 1 (0.2)                               |
| Myeloma                   | 867 (1.6)                                       | 642 (74.1)                             | 591 (68.2)                                | 257 (29.6)                             | 11 (1.3)                              |
| Oesophageal               | 1,368 (2.6)                                     | 715 (52.3)                             | 575 (42.0)                                | 170 (12.4)                             | 153 (11.2)                            |
| Oral                      | 1,118 (2.1)                                     | 308 (27.6)                             | 203 (18.2)                                | 181 (16.2)                             | 3 (0.3)                               |



|                 |              |              |              |            |            |
|-----------------|--------------|--------------|--------------|------------|------------|
| Ovarian         | 1,152 (2.2)  | 814 (70.7)   | 645 (56.0)   | 565 (49.1) | 19 (1.7)   |
| Pancreatic      | 1,623 (3.1)  | 1,128 (69.5) | 985 (60.7)   | 560 (34.5) | 64 (4.0)   |
| Prostate        | 9,119 (17.1) | 7,863 (86.2) | 7,630 (83.7) | 792 (8.7)  | 20 (0.2)   |
| Rectal          | 1,888 (3.6)  | 1,146 (60.7) | 1,062 (54.5) | 131 (6.9)  | 87 (4.6)   |
| Renal           | 1,585 (3.0)  | 930 (58.7)   | 580 (36.6)   | 574 (36.2) | 20 (1.3)   |
| Small intestine | 248 (0.5)    | 159 (64.1)   | 136 (54.8)   | 58 (23.4)  | 15 (6.1)   |
| Stomach         | 972 (1.8)    | 662 (68.1)   | 564 (58.0)   | 175 (18.0) | 106 (11.0) |
| Testicular      | 422 (0.8)    | 265 (62.8)   | 43 (10.2)    | 244 (57.8) | 0 (0.0)    |
| Thyroid         | 638 (1.2)    | 431 (67.6)   | 260 (40.8)   | 330 (51.7) | 0 (0.0)    |
| Vulval          | 181 (0.3)    | 30 (16.6)    | 15 (8.3)     | 10 (5.5)   | 1 (0.6)    |
| Unknown primary | 1,048 (2.0)  | 621 (59.3)   | 494 (47.1)   | 355 (33.8) | 15 (1.4)   |
| Other           | 2,422 (4.6)  | 1,141 (47.1) | 786 (32.5)   | 600 (24.8) | 21 (0.8)   |

**Table 5: Between-practice variation in the adjusted mixed models by varying patient factors**

| Variables                                           | Any investigation<br>SD (95% CI) | Blood test<br>SD (95% CI) | Imaging<br>SD (95% CI) |
|-----------------------------------------------------|----------------------------------|---------------------------|------------------------|
| Age, gender, ethnicity                              | 0.37 (0.34-0.40)                 | 0.38 (0.36-0.41)          | 0.29 (0.26-0.32)       |
| Age, gender, ethnicity,<br>deprivation              | 0.37 (0.34-0.40)                 | 0.38 (0.36-0.41)          | 0.27 (0.24-0.31)       |
| Age, gender, ethnicity,<br>deprivation, comorbidity | 0.37 (0.34-0.40)                 | 0.39 (0.36-0.42)          | 0.27 (0.24-0.31)       |
